# Supplementary material for: Validity Evidence for the Internal Structure of the Maslach Burnout Inventory-Student Survey: A Comparison between Classical CFA Model and the ESEM and the Bifactor Models
Source: MDPI journal article supplement (doi:10.3390/math11061515), 2023-03-21
Supplement: s1 [file s1]

**Table S2.** Formulas for the reliability indices.

| Reliability coefficient | Formula                                                                                                                                                                                                       | Reference |
|-------------------------|---------------------------------------------------------------------------------------------------------------------------------------------------------------------------------------------------------------|-----------|
| Alpha                   | $\frac{J}{J-1} \left[ 1 - \frac{\sum_{1 \leq i \neq k \leq J} (\sigma_{ik})}{\sigma_X^2} \right]$                                                                                                             | [31]      |
| Omega total             | $\frac{(\sum_{i=1}^J \lambda_i)^2}{(\sum_{i=1}^J \lambda_i)^2 + \sum_{i=1}^J \sigma_{\varepsilon i}^2}$                                                                                                       | [35]      |
| Omega hierarchical      | $\frac{(\sum_{i=1}^J \lambda_i^{(g)})^2}{(\sum_{i=1}^J \lambda_i^{(g)})^2 + \sum_{i=1}^J \sigma_{\varepsilon i}^2 + (\sum_{i=1}^{J_1} \lambda_i^{(s_1)})^2 + \dots + (\sum_{i=1}^{J_p} \lambda_i^{(s_p)})^2}$ | [35]      |
| Omega subscale          | $\frac{(\sum_{i=1}^{J_h} \lambda_i^{(s_h)})^2}{(\sum_{i=1}^{J_h} \lambda_i^{(g)})^2 + \sum_{i=1}^{J_h} \sigma_{\varepsilon i}^2 + (\sum_{i=1}^{J_h} \lambda_i^{(s_h)})^2}$                                    | [75]      |

Note. Formulas for the reliability indices are computed depending on the measurement model.  $J$  = Number of items;  $\sigma_{ik}$  = Covariance between item  $i$  and item  $k$ ;  $\sigma_X^2$  = Test variance;  $\lambda_i$  = Factor loading for item  $i$ ;  $\sigma_{\varepsilon i}^2$  = Error variance for item  $i$ ;  $\lambda_i^{(g)}$  = Factor loading of item  $i$  on the general factor  $g$ ;  $\lambda_i^{(s_1)}, \dots, \lambda_i^{(s_h)}, \dots, \lambda_i^{(s_p)}$  = Factor loadings of item  $i$  on the specific factors  $s_1, \dots, s_h, \dots, s_p$ ; and the specific factors comprise  $J_1, \dots, J_h, \dots, J_p$  items.
