# Supplementary material for: Validity Evidence for the Internal Structure of the Maslach Burnout Inventory-Student Survey: A Comparison between Classical CFA Model and the ESEM and the Bifactor Models
Source: MDPI journal article supplement (doi:10.3390/math11061515), 2023-03-21
Supplement: s1 [file s1]

**Table S1.** Descriptive statistics and correlations for the MBI-SS items (N = 1162).

| Item    | <i>M</i> | <i>SD</i> | 1     | 2     | 3     | 4     | 5     | 6     | 7     | 8     | 9     | 10   | 11   | 12   | 13   | 14   | 15 |
|---------|----------|-----------|-------|-------|-------|-------|-------|-------|-------|-------|-------|------|------|------|------|------|----|
| 1. EE1  | 1.85     | 1.66      | 1     |       |       |       |       |       |       |       |       |      |      |      |      |      |    |
| 2. EE2  | 3.19     | 1.80      | 0.39  | 1     |       |       |       |       |       |       |       |      |      |      |      |      |    |
| 3. EE3  | 2.80     | 1.76      | 0.34  | 0.40  | 1     |       |       |       |       |       |       |      |      |      |      |      |    |
| 4. EE4  | 3.40     | 1.70      | 0.33  | 0.39  | 0.39  | 1     |       |       |       |       |       |      |      |      |      |      |    |
| 5. EE5  | 2.47     | 1.73      | 0.49  | 0.41  | 0.43  | 0.46  | 1     |       |       |       |       |      |      |      |      |      |    |
| 6. D1   | 1.86     | 1.73      | 0.39  | 0.36  | 0.28  | 0.19  | 0.38  | 1     |       |       |       |      |      |      |      |      |    |
| 7. D2   | 2.03     | 1.80      | 0.28  | 0.19  | 0.24  | 0.18  | 0.36  | 0.41  | 1     |       |       |      |      |      |      |      |    |
| 8. D3   | 1.60     | 1.75      | 0.36  | 0.26  | 0.25  | 0.14  | 0.41  | 0.43  | 0.41  | 1     |       |      |      |      |      |      |    |
| 9. D4   | 1.72     | 1.81      | 0.40  | 0.29  | 0.26  | 0.16  | 0.45  | 0.43  | 0.45  | 0.70  | 1     |      |      |      |      |      |    |
| 10. PA1 | 4.48     | 1.39      | -0.15 | -0.04 | -0.16 | 0.00  | -0.19 | -0.10 | 0.13  | -0.20 | -0.22 | 1    |      |      |      |      |    |
| 11. PA2 | 3.88     | 1.63      | -0.09 | -0.09 | -0.08 | 0.02  | -0.11 | -0.12 | -0.09 | -0.17 | -0.20 | 0.34 | 1    |      |      |      |    |
| 12. PA3 | 4.58     | 1.31      | -0.13 | -0.08 | -0.10 | 0.04  | -0.13 | -0.18 | -0.12 | -0.23 | -0.27 | 0.35 | 0.40 | 1    |      |      |    |
| 13. PA4 | 4.96     | 1.25      | -0.18 | -0.06 | -0.10 | 0.05  | -0.21 | -0.23 | -0.24 | -0.33 | -0.34 | 0.35 | 0.39 | 0.55 | 1    |      |    |
| 14. PA5 | 4.06     | 1.40      | -0.11 | -0.15 | -0.15 | 0.00  | -0.15 | -0.14 | -0.07 | -0.18 | -0.22 | 0.36 | 0.46 | 0.42 | 0.35 | 1    |    |
| 15. PA6 | 5.02     | 1.39      | -0.23 | -0.11 | -0.14 | -0.01 | -0.25 | -0.29 | -0.28 | -0.47 | -0.44 | 0.29 | 0.27 | 0.33 | 0.44 | 0.29 | 1  |
